# Supplementary material for: Telomerase mutations in smokers with severe emphysema
Source: JCI journal article supplement (doi:10.1172/jci78554), 2014-12-21
Supplement: sd1 [file 1]

## Supplementary Figure Legends

**Supplementary Figure 1. Filtering strategy for identifying telomerase variants for functional analysis.** Flow chart delineates a priori designed filtering strategy to identify rare telomerase variants in COPDGene and Lung Health Study (LHS). \*Refers to publicly available VAAST software described in Yandell et al. *Genome Research* 2011. EVS refers to the Exome Variant Server, MAF to minor allele frequency and VCF to virtual contact file.

**Supplementary Figure 2. Functional consequences of telomerase variant identified in COPDGene controls.** **A.** Gel image of telomeric DNA repeats generated from wild-type and variant telomerases reconstituted *in vivo* and immuno-purified. The total intensity of the DNA repeat products generated by TERT Arg653Cys shows similar activity as wild-type telomerase. A  $^{32}\text{P}$  end-labeled 18mer oligonucleotide is included as an internal control for the recovery of DNA products. **B.** Northern blot for TR levels from immuno-purified telomerases and western blot for TERT expression in cells. Western blot performed with anti-FLAG and anti-GAPDH antibodies for ectopically expressed FLAG-tagged TERT and endogenous GAPDH, respectively. **C.** Mean telomerase activity from four independent activity assays from two separate transfections. Enzymes were purified from cell lysates from two separate transfections and these experiments were done independent of those shown in Figure 1. Error bars represent standard error of the mean. P-values were calculated using Student's *t*-test and are two-sided.

**Supplementary Figure 3. Conservation of mutated residues in TERT.** **A.** Mutations fall in conserved catalytic domains of the telomerase reverse transcriptase. **B.** Evolutionary conservation of TERT variants across seven species. Mutated residues are labeled above the alignment. Alignments were generated with the online tools Clustal Omega (<http://www.ebi.ac.uk/Tools/msa/clustalo/>) and BoxShade ([http://www.ch.embnet.org/software/BOX\\_form.html](http://www.ch.embnet.org/software/BOX_form.html)).

**Supplementary Figure 4. Depth of coverage in next-generation sequence data.** Percent coverage is shown as percent of sequences with 8X or greater coverage in the COPDGene (whole exome sequencing) and Lung Health Study cases (customized targeted panel). Eleven exomes were selected randomly for the COPDGene coverage analysis. For the Lung Health Study, the coverage reflects data from the 76 samples that passed quality control. The mean coverage calculation included exons and their flanking sequence. For *SERPINA1*, coverage included exon 6 and the 20 flanking nucleotides since this region represents the most common severe alpha-1 antitrypsin deficiency allele (PI\*Z, rs28929474). Coverage from the COPDGene exomes was calculated from Binary Alignment/Map (BAM) files downloaded from the dbGaP portal.

Supplementary Figure 1

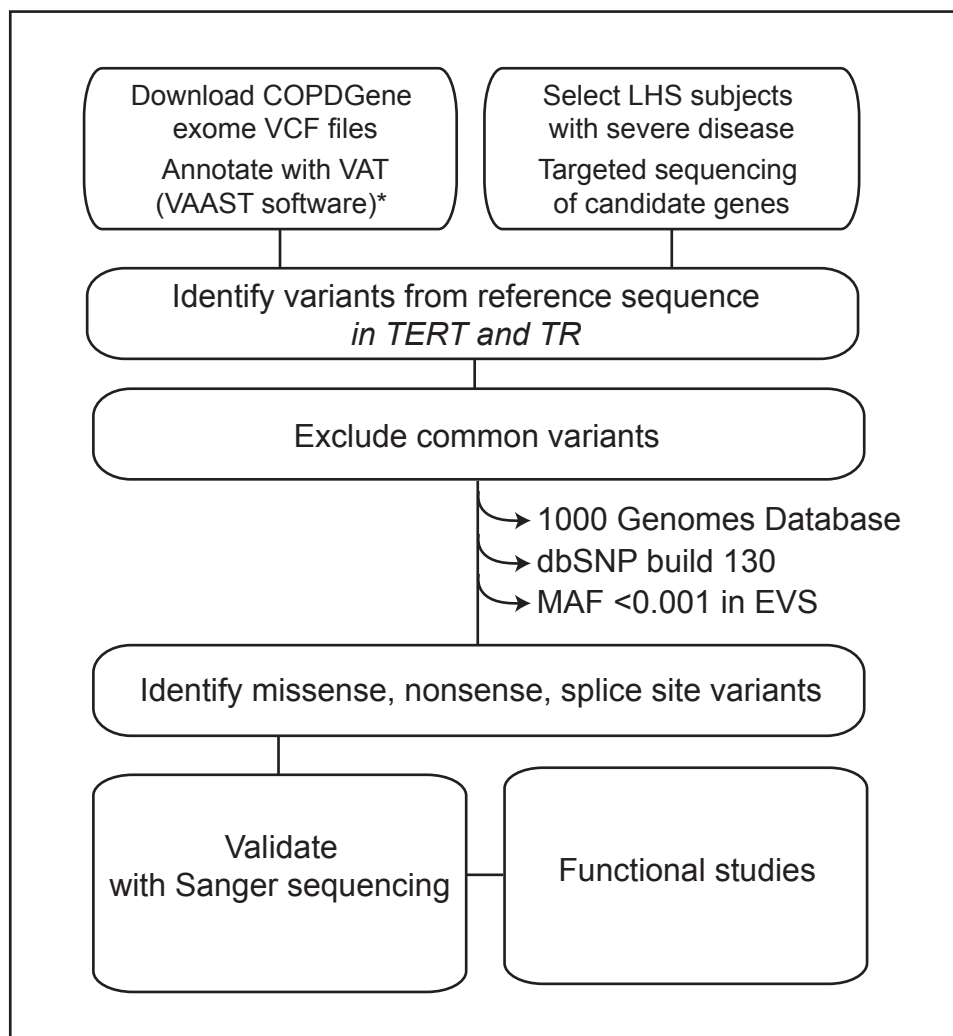

Supplementary Figure 2

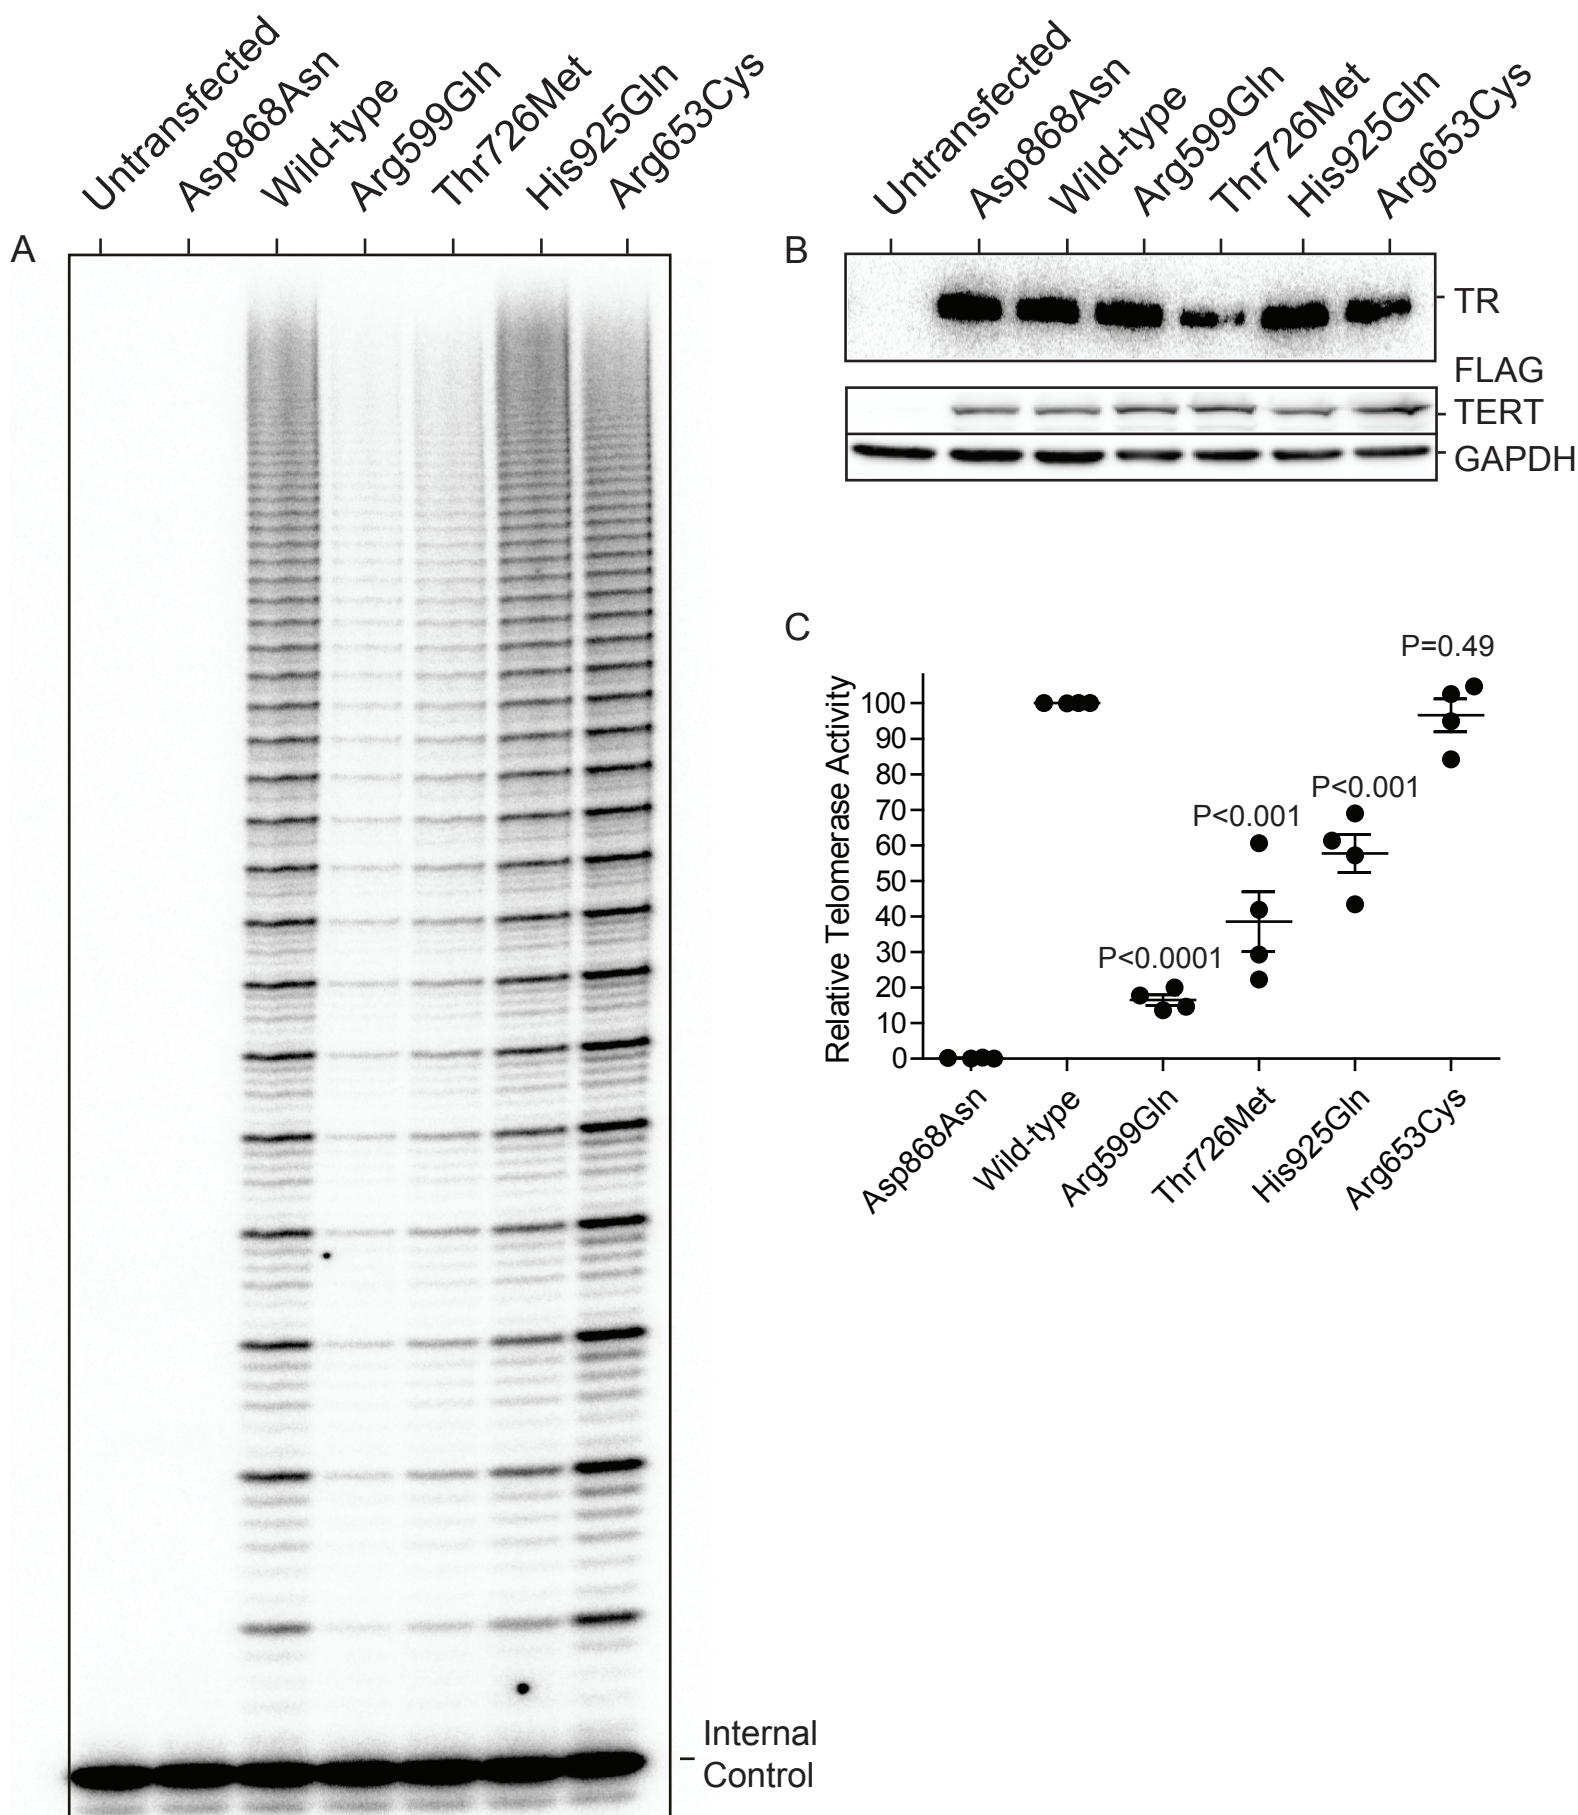

Supplementary Figure 3

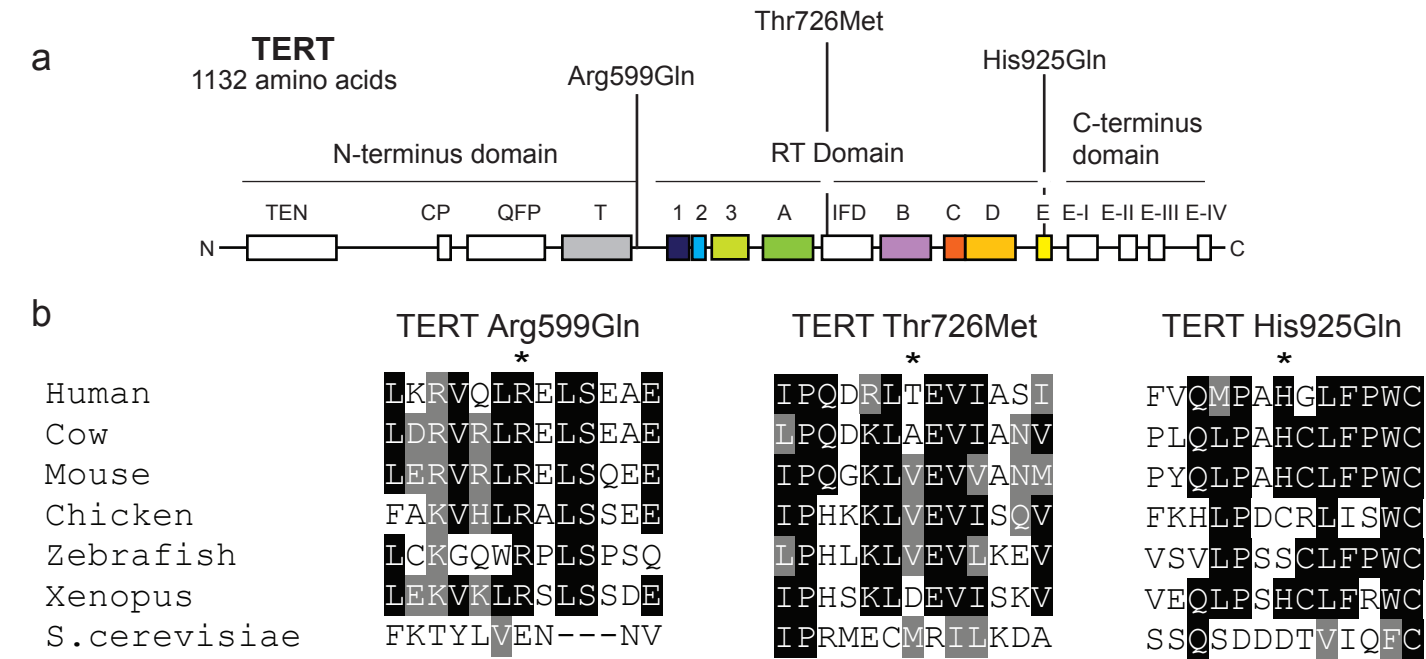

Supplementary Figure 4

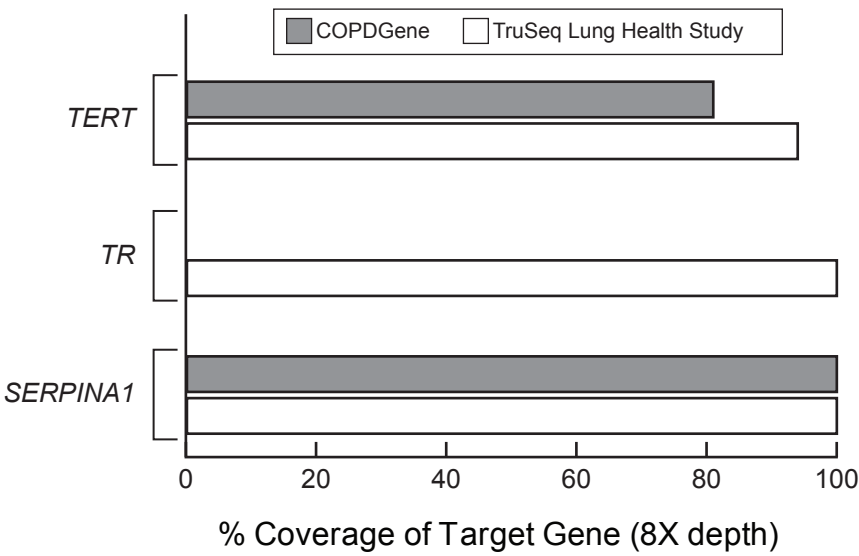

**Supplementary Table 1. Allele frequencies of rare *TERT* variants**

| Variant                                          | 1000<br>Genomes<br>(n=1,092) | Mutli-<br>ethnic<br>Cohort<br>(n=528)* | Other<br>Controls<br>(n=400)** | Exome<br>Variant<br>Server<br>(n=6,503) | LHS<br>Subjects<br>(n=83) | Minor Allele<br>Frequency |
|--------------------------------------------------|------------------------------|----------------------------------------|--------------------------------|-----------------------------------------|---------------------------|---------------------------|
| <i>TERT</i><br>Arg599Gln<br>CGG>CAG              | 0                            | 0                                      | 0                              | 1                                       | 0                         | $5.8 \times 10^{-5}$      |
| <i>TERT</i><br>Arg653Cys<br>CGT>TGT <sup>†</sup> | 0                            | 0                                      | 0                              | 1 <sup>†</sup>                          | 0                         | $5.8 \times 10^{-5}$      |
| <i>TERT</i><br>Thr726Met<br>ACG>ATG              | 0                            | 0                                      | 0                              | 4 <sup>††</sup>                         | 0                         | $2.3 \times 10^{-4}$      |
| <i>TERT</i><br>His925Gln<br>CAC>CAA              | 0                            | 0                                      | 0                              | 0                                       | 1                         | $5.8 \times 10^{-5}$      |

LHS, Lung Health Study; MAF, minor allele frequency

\**TERT* sequence data from multi-ethnic cohort examined in Yamaguchi et al. *NEJM* 2005.

\*\*DNA from these controls of European descent was obtained through the National Disease Research Interchange

<sup>†</sup>This variant was present in the COPD Gene control group had comparable activity to wild-type telomerase

<sup>††</sup>This variant was reported previously in a child with aplastic anemia in Liang J et al. *Haematologica* 2006.

**Supplementary Table 2. Clinical features of subjects with *TERT* mutations in the COPDGene and Lung Health Studies**

| Age at<br>Diagnosis<br>(y) | Age at<br>Enrollment<br>(y) | Gender | Mutation                            | Parent<br>Study      | Smoking<br>History<br>(pack-<br>years) | BMI<br>(kg/m <sup>2</sup> ) | Pulmonary Function Tests     |               |                                 | CT Findings                                                                              | Resting<br>saturation<br>(%)<br>(Hours on<br>oxygen) | Co-morbidities                                                                       |
|----------------------------|-----------------------------|--------|-------------------------------------|----------------------|----------------------------------------|-----------------------------|------------------------------|---------------|---------------------------------|------------------------------------------------------------------------------------------|------------------------------------------------------|--------------------------------------------------------------------------------------|
|                            |                             |        |                                     |                      |                                        |                             | FEV <sub>1</sub><br>(L/s, %) | FVC<br>(L, %) | FEV <sub>1</sub> /FVC<br>(%, %) |                                                                                          |                                                      |                                                                                      |
| 46                         | 41                          | F      | <i>TERT</i><br>His925Gln<br>CAC>CAA | Lung Health<br>Study | 18*                                    | 21.3                        | 1.34 (47)                    | 2.79 (79)     | 48 (58)                         | -                                                                                        | -                                                    | -                                                                                    |
| 49                         | 57<br>(d 62)                | F      | <i>TERT</i><br>Arg599Gln<br>CGG>CAG | COPDGene             | 43                                     | 19.4                        | 0.45 (20)                    | 1.65 (56)     | 27 (35)                         | Emphysema (30%)<br>Interstitial abnormality<br>Bronchiectasis<br>Expiratory air trapping | 82<br>(24 h)                                         | Pneumothorax                                                                         |
| 53                         | 57                          | F      | <i>TERT</i><br>Thr726Met<br>ACG>ATG | COPDGene             | 48                                     | 18.9                        | 0.69 (26)                    | 2.16 (63)     | 31 (41)                         | Emphysema (40%)                                                                          | 95<br>(6 h)                                          | Stomach ulcers<br>Vertebral fractures<br>Osteoporosis<br>Congestive Heart<br>Failure |

Abbreviations: BMI, body mass index; FEV<sub>1</sub>, forced expiratory volume in 1 second; FVC, forced vital capacity

\*Smoking history was recorded at study enrollment; pulmonary functions are from year 5 of study.

**Supplementary Table 3. Minor allele frequency of *TERT* Variants found in COPDGene and LHS subjects\***

| <b>Variant**<br/>(chr5)</b>  | <b>COPDGene<br/>Controls<br/>(n=206)</b> | <b>COPDGene<br/>Cases<br/>(n=209)</b> | <b>Lung Health<br/>Study<br/>(n=83)</b> | <b>Previous report</b> | <b>NCBI<br/>submitted<br/>SNP number</b> |
|------------------------------|------------------------------------------|---------------------------------------|-----------------------------------------|------------------------|------------------------------------------|
| g.1295060G>A<br>p.Arg15Arg   | 0                                        | 0                                     | 0.012                                   | -                      | 1477761192                               |
| g.1295018C>T<br>p.Arg29Arg   | 0                                        | 0                                     | 0.012                                   | -                      | 1477761156                               |
| g.1294166C>T<br>p.Ala279Thr  | 0.032                                    | 0.041                                 | 0.06                                    | rs61748181             | 1477761119                               |
| g.1294086C>T<br>p.Ala305Ala  | 0.279                                    | 0.275                                 | 0.446                                   | rs2736098              | 1477761081                               |
| g.1293767G>A<br>p.His412Tyr  | 0.002                                    | 0.002                                 | 0.012                                   | rs34094720             | 1477761044                               |
| g.1280411T>C<br>p.Ala604Ala  | 0.007                                    | 0                                     | 0.012                                   | rs33959226             | 1477760829                               |
| g.1280387G>C<br>p.Ala612Ala  | 0                                        | 0                                     | 0.012                                   | rs34170122             | 1477760794                               |
| g.1279505G>A<br>p.Gly677Gly  | 0.012                                    | 0.012                                 | 0.036                                   | rs33956095             | 1477760682                               |
| g.1279439G>A<br>p.Ala699Ala  | 0.012                                    | 0.005                                 | 0                                       | rs33963617             | -                                        |
| g.1279430C>T<br>p.Pro702Pro  | 0                                        | 0                                     | 0.012                                   | rs151055240            | 1477760646                               |
| g.1278888,G,A<br>p.Asp718Asp | 0                                        | 0.003                                 | 0                                       | -                      | -                                        |
| g.1278804C>T<br>p.Val746Val  | 0                                        | 0                                     | 0.012                                   | -                      | 1477760573                               |
| g.1271254G>A<br>p.His816His  | 0                                        | 0.003                                 | 0                                       | -                      | -                                        |
| g.1268700C>T<br>p.Thr839Thr  | 0                                        | 0.003                                 | 0                                       | rs140124989            | -                                        |
| g.1264611C>T<br>p.Thr917Thr  | 0                                        | 0.003                                 | 0                                       | -                      | -                                        |
| g.1264587G>A<br>p.His925His  | 0                                        | 0                                     | 0.012                                   | rs34528119             | 1477760502                               |
| g.1260708G>T<br>p.Arg951Arg  | 0                                        | 0.003                                 | 0                                       | -                      | -                                        |
| g.1255520G>A<br>p.His1013His | 0.104                                    | 0.1                                   | 0.181                                   | rs33954691             | 1477760465                               |
| g.1255454G>A<br>p.Val1035Val | 0.005                                    | 0.005                                 | 0                                       | rs181612536            | -                                        |
| g.1254594C>T<br>p.Ala1062Thr | 0.014                                    | 0.022                                 | 0.036                                   | rs35719940             | 1477760428                               |
| g.1253918C>T<br>p.Pro1108Pro | 0.019                                    | 0.029                                 | 0.108                                   | rs35033501             | 1477760388                               |

\*No SNPs in *TR* were identified.

\*\*Coordinates refer to hg19 version of the genome.
